# Supplementary material
Source: PubMed Central journal article supplement (PMC2740443)
Supplement: supp_M109.008441_jbc.M109.008441-1.pdf [file supp_M109.008441_jbc.M109.008441-1.pdf]

Supplemental Table 1. Primers, used throughout the study. Engineered endonuclease restriction sites are underlined. Sense (“s”) and antisense (“a”) oligos are shown in 5’- to 3’-direction.

| Primer ID | Sequence                                 | Plasmid          | Resulting product                              |
|-----------|------------------------------------------|------------------|------------------------------------------------|
| #233 s    | ATCTGGTTCCGCGT <u>GGATCC</u> ATGGGAAAGG  | p266             | Full-size eEF1A                                |
| #232 a    | GATGAATTCGGGATAATATTCATTTAGCCTTCTG       | p266             | Full-size eEF1A                                |
| #315 s    | TCGCGGACATATGGGAAAGGAAAAGACTC            | p328 - p331      | COOH-terminal truncations of eEF1A             |
| #313 a    | CATTGGTGGGGAATTCTAGCTGTCA                | p328             | 38 kDa truncation of eEF1A                     |
| #314 a    | AGAGGCGAGCTCTAGGGCTTGTCAG                | p329             | 29 kDa truncation of eEF1A                     |
| #316 a    | TTTGTCTGACTCAGACAATTAGTTGTTTTC           | p330             | 19 kDa truncation of eEF1A                     |
| #317 a    | ACAAGGAGCTCTAAATGGTGATAC                 | p331             | 10 kDa truncation of eEF1A                     |
| #352 s    | CCATCATATGTATAAATGCGGTGGCATCGAC          | p356             | 7 kDa truncation of eEF1A                      |
| #353 s    | GGCTGCTCATATGGGAAAGGGCTCC                | p357             | 5 kDa truncation of eEF1A                      |
| #350 a    | CCACTGCGATCCCCGGGAAAACAGC                | p356, p357, p402 | NH <sub>2</sub> -terminal truncations of eEF1A |
| #386 s    | CGGCAGCGGATCCTATAAATGCGGTGGC             | p403             | Identical to p356                              |
| #385 a    | GAACGTGGAATTCAACGTCAAAGGGCG              | p403             | Identical to p356                              |
| #382 s    | GGCAGCGGATCCGAAAGGGCTCCTTCAA             | p402             | Identical to p357                              |
| #393 s    | GATCCGGCAAAGCTTCGTTTGCATATGCATGGGTCTGAG  | p407             | Hbs1-derived peptide                           |
| #394 a    | TCGACTCAGACCCATGCATATGCAAACGAAGCTTTGCCG  | p407             | Hbs1-derived peptide                           |
| #404 s    | AATTCCTCGAAAGGGCTCCTTCAAGTATGCCTGGGTCTAG | p434             | Truncated eEF1A peptide                        |
| #405 a    | TCGACTAGACCCAGGCATACTTGAAGGAGCCCTTTCCGGG | p434             | Truncated eEF1A peptide                        |
| #425 s    | AATTCCTCGAAAGGGCTCCTTCAAGTATGCCTGGTAG    | p452             | Truncated eEF1A peptide                        |
| #426 a    | TCGACTACCAGGCATACTTGAAGGAGCCCTTTCCGGG    | p452             | Truncated eEF1A peptide                        |
| #427 s    | AATTCCTCGAAAGGGCTCCTTCAAGTATGCCTAG       | p453             | Truncated eEF1A peptide                        |
| #428 a    | TCGACTAGGCATACTTGAAGGAGCCCTTTCCGGG       | p453             | Truncated eEF1A peptide                        |
| #429 s    | AATTCCTCGAAAGGGCTCCTTCAAGTATTAG          | p454             | Truncated eEF1A peptide                        |
| #430 a    | TCGACTAATACTTGAAGGAGCCCTTTCCGGG          | p454             | Truncated eEF1A peptide                        |
| #435 s    | AATTCCTCGAAAGGGCTCCTTCAAGTAG             | p457             | Truncated eEF1A peptide                        |
| #436 a    | TCGACTACTTGAAGGAGCCCTTTCCGGG             | p457             | Truncated eEF1A peptide                        |

|        |                                          |      |                           |
|--------|------------------------------------------|------|---------------------------|
| #437 s | AATTCCCGGAAAGGGCTCCTTCTAG                | p458 | Truncated eEF1A peptide   |
| #438 a | TCGACTAGAAGGAGCCCTTTCCGGG                | p458 | Truncated eEF1A peptide   |
| #431 s | AATTCCCAAGGGCTCCTTCAAGTATGCCTGGTAG       | p455 | Truncated eEF1A peptide   |
| #432 a | TCGACTACCAGGCATACTTGAAGGAGCCCTTGGG       | p455 | Truncated eEF1A peptide   |
| #433 s | AATTCCCGGCTCCTTCAAGTATGCCTGGTAG          | p456 | Truncated eEF1A peptide   |
| #434 a | TCGACTACCAGGCATACTTGAAGGAGCCGGG          | p456 | Truncated eEF1A peptide   |
| #439 s | AATTCCCTCCTTCAAGTATGCCTGGTAG             | p459 | Truncated eEF1A peptide   |
| #440 a | TCGACTACCAGGCATACTTGAAGGAGGG             | p459 | Truncated eEF1A peptide   |
| #469 s | AATTCCCAAGGGCTCCTTCAAGTATGCCTGGGTCTAG    | p485 | Truncated eEF1A peptide   |
| #470 a | TCGACTAGACCCAGGCATACTTGAAGGAGCCCTTGGG    | p485 | Truncated eEF1A peptide   |
| #455 s | AATTCCCGCTAAGGGCTCCTTCAAGTATGCCTGGGTCTAG | p478 | eEF1A peptide mutagenesis |
| #456 a | TCGACTAGACCCAGGCATACTTGAAGGAGCCCTTAGCGGG | p478 | eEF1A peptide mutagenesis |
| #457 s | AATTCCCGGAGCTGGCTCCTTCAAGTATGCCTGGGTCTAG | p479 | eEF1A peptide mutagenesis |
| #458 a | TCGACTAGACCCAGGCATACTTGAAGGAGCCAGCTCCGGG | p479 | eEF1A peptide mutagenesis |
| #406 s | AATTCCCGGAAAGGGCGCCTTCAAGTATGCCTGGGTCTAG | p435 | eEF1A peptide mutagenesis |
| #407 a | TCGACTAGACCCAGGCATACTTGAAGGCGCCCTTTCCGGG | p435 | eEF1A peptide mutagenesis |
| #459 s | AATTCCCGGAAAGGGCTCCGCTAAGTATGCCTGGGTCTAG | p480 | eEF1A peptide mutagenesis |
| #460 a | TCGACTAGACCCAGGCATACTTAGCGGAGCCCTTTCCGGG | p480 | eEF1A peptide mutagenesis |
| #461 s | AATTCCCGGAAAGGGCTCCTTCAAGGCTGCCTGGGTCTAG | p481 | eEF1A peptide mutagenesis |
| #462 a | TCGACTAGACCCAGGCAGCCTTGAAGGAGCCCTTTCCGGG | p481 | eEF1A peptide mutagenesis |
| #467 s | AATTCCCGGAAAGGGCTCCTTCAAGTATGGTTGGGTCTAG | p484 | eEF1A peptide mutagenesis |
| #468 a | TCGACTAGACCCAACCATACTTGAAGGAGCCCTTTCCGGG | p484 | eEF1A peptide mutagenesis |
| #463 s | AATTCCCGGAAAGGGCTCCTTCAAGTATGCCGCTGTCTAG | p482 | eEF1A peptide mutagenesis |
| #464 a | TCGACTAGACAGCGGCATACTTGAAGGAGCCCTTTCCGGG | p482 | eEF1A peptide mutagenesis |
| #465 s | AATTCCCGGAAAGGGCTCCTTCAAGTATGCCTGGGCTTAG | p483 | eEF1A peptide mutagenesis |
| #466 a | TCGACTAAGCCCAGGCATACTTGAAGGAGCCCTTTCCGGG | p483 | eEF1A peptide mutagenesis |

---
