# Supplementary material
Source: PubMed Central journal article supplement (PMC2740443)

## Supplemental Material

Supplemental Fig. 1. Modification of a decapeptide 50-GKGSFKYAWV-59 by  $^{14}\text{C}$ -glucosylation. Synthetic peptides acetyl-GKGSFKYAWV-NH<sub>2</sub> (*lane 1*) and acetyl-GKGAFKYAWV-NH<sub>2</sub> (*lane 2*) at a concentration of 10  $\mu\text{M}$  were incubated with 28 nM of Lgt1 in a  $^{14}\text{C}$ -glucosylation mixture for 10 min at 37°C. Thereafter products of the reaction were investigated by 15% SDS-PAGE and autoradiography. *Lane 3* represents negative control without added substrates.

Supplemental Fig. 2. Characterization of purified yeast eEF1A. *A*, SDS-PAGE analysis of eEF1A (Coomassie staining, 1  $\mu\text{g}$  per lane). *B*, GTPase activity of purified yeast eEF1A. Purification of elongation factor and determination of its GTPase activity were described in EXPERIMENTAL PROCEDURES. Data are presented as mean of at least 3 independent measurements with standard deviation.

Supplemental Fig. 3. Dynamic studies of glucosylation of different substrates by Lgt1. One  $\mu\text{M}$  of each purified substrates was incubated with 70 nM Lgt1 and 10  $\mu\text{M}$  UDP- $^{14}\text{C}$ glucose at 37°C for 3, 10 and 30 min. Representative glucosylation of eEF1A-derived decapeptide (*a*), Hbs1 (*b*), Hbs1-derived decapeptide (*c*); eEF1A-derived 25-mer peptide (*d*), G domain of eEF1A (*e*) and yeast eEF1A (*f*) at 3, 10 and 30 min are shown as an autoradiogram.

# Supplemental Fig. 1

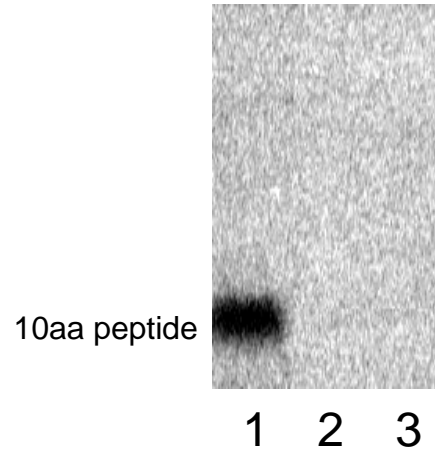

# Supplemental Fig. 2

A

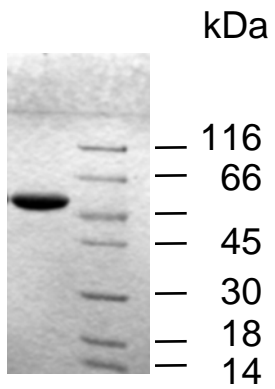

B

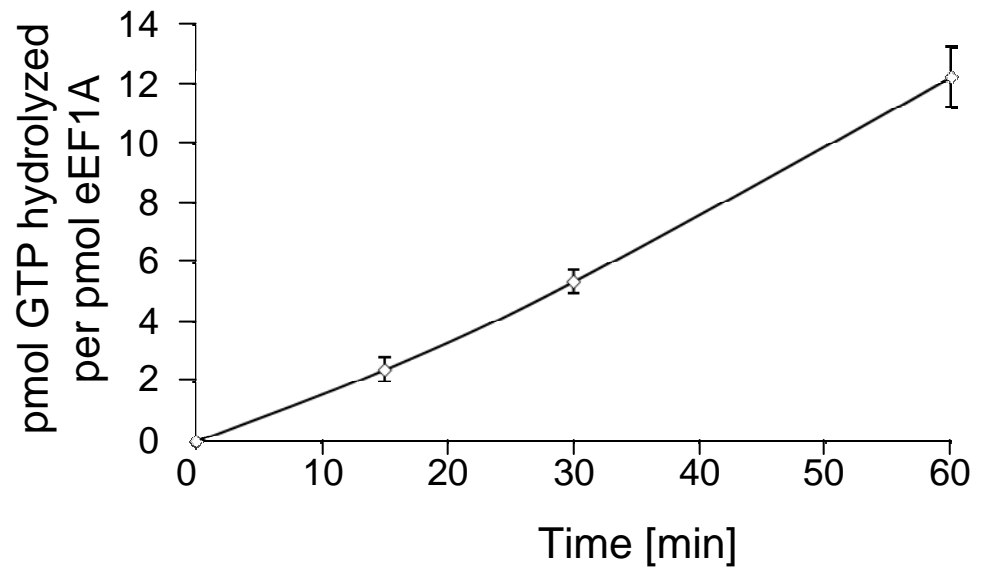

# Supplemental Fig. 3

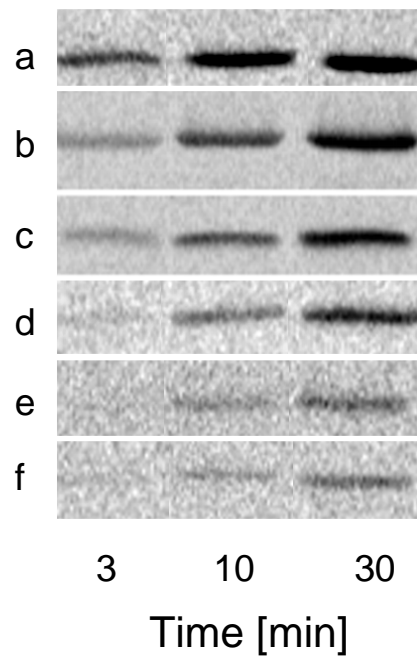

Supplement: supp_M109.008441_jbc.M109.008441-2.pdf [file supp_M109.008441_jbc.M109.008441-2.pdf]
